# Supplementary material for: Washing or filtering of blood products does not improve outcome in a rat model of trauma and multiple transfusion
Source: PubMed Central journal article supplement — Transfusion. 2018 Nov 21;59(1):134–45. doi: 10.1111/trf.15039 (PMC7379301; doi:10.1111/trf.15039), 2018-11-21
Supplement: TRF-59-134-s001.pdf [file TRF-59-134-s001.pdf]

**Supplemental figure 1. Blunt guillotine used for the femur fracture.**

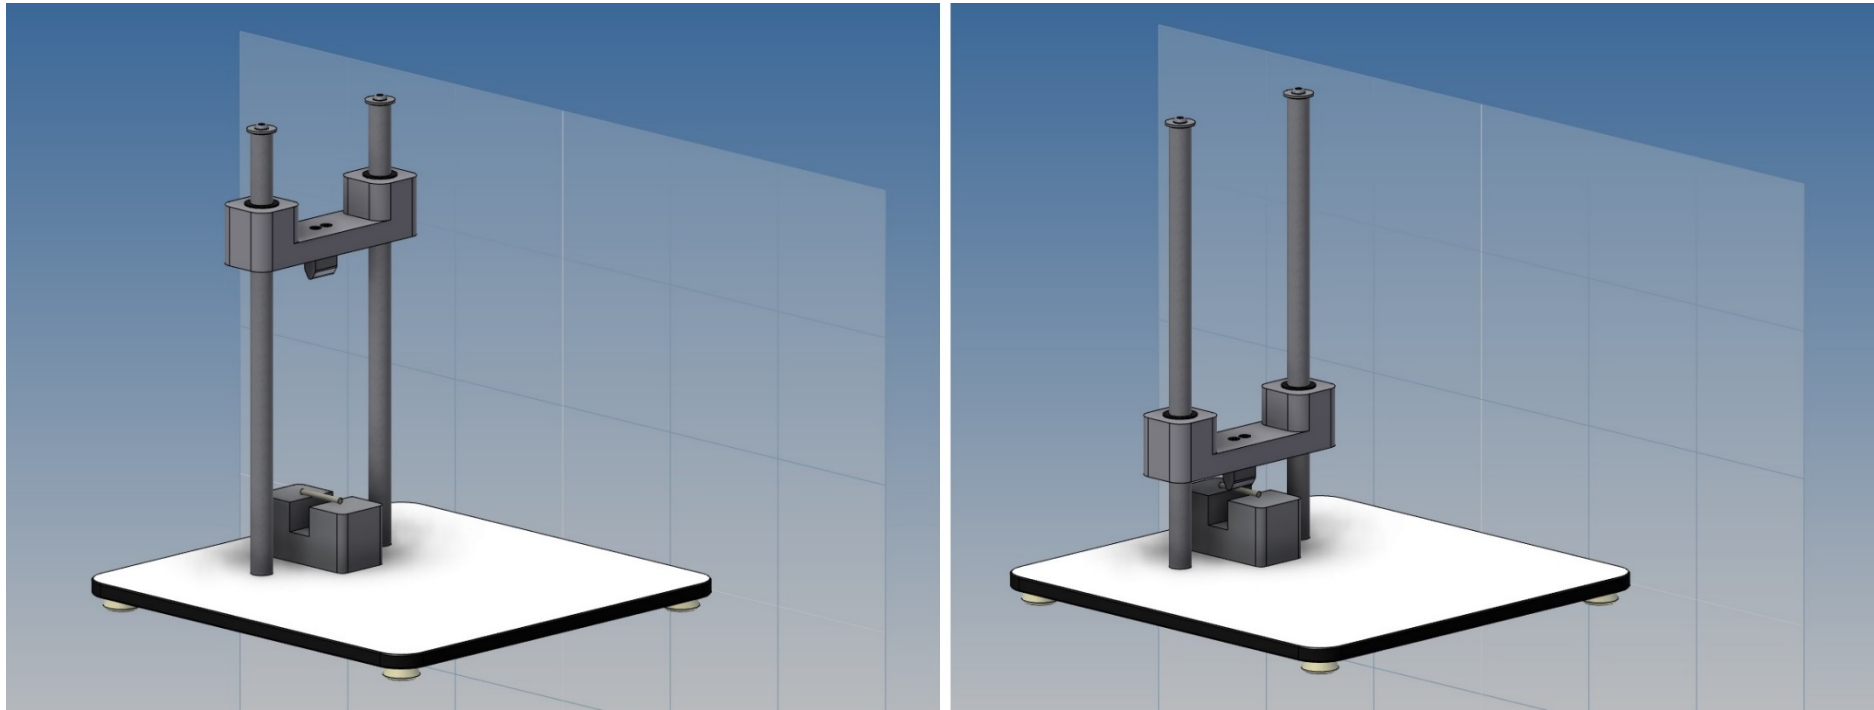

**Supplemental Figure 1. Blunt guillotine used for the femur fracture of all traumatized rats. Tubes are 23 cm in height. A marking is placed at 14 cm (height from which the weight should be dropped). Weight of the cross bar is 650 grams. Distance between the supporting pillars for the femur is 2 cm.**

**Supplemental figure 2. Size characterization of extracellular vesicles based on cell of origin**

PLT-derived EVs

WBC-derived EVs

RBC-derived EVs

**Standard RBC product**

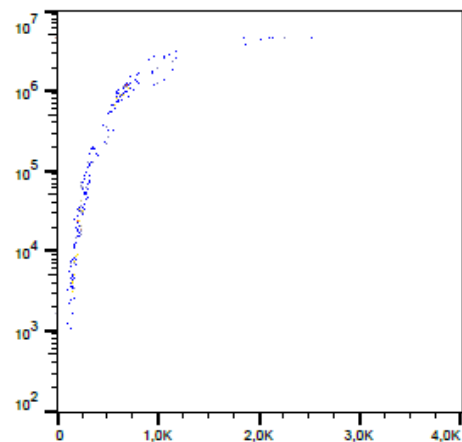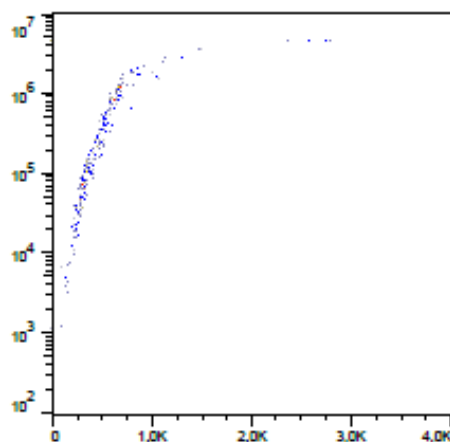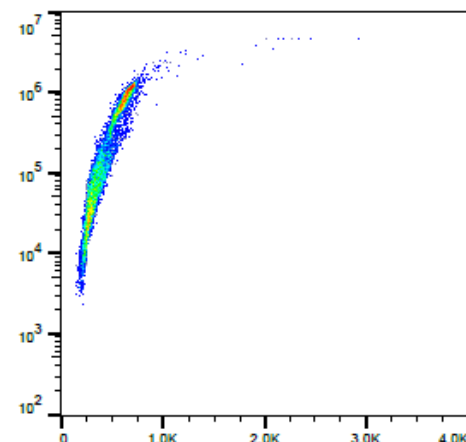

**Optimized RBC product**

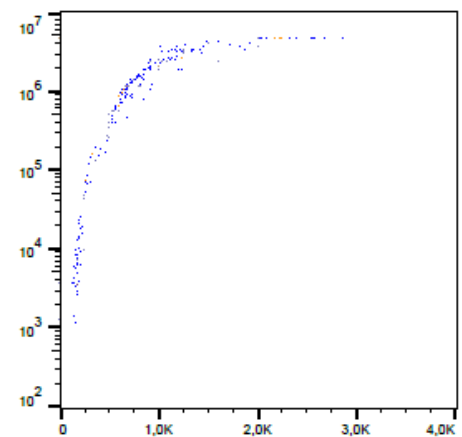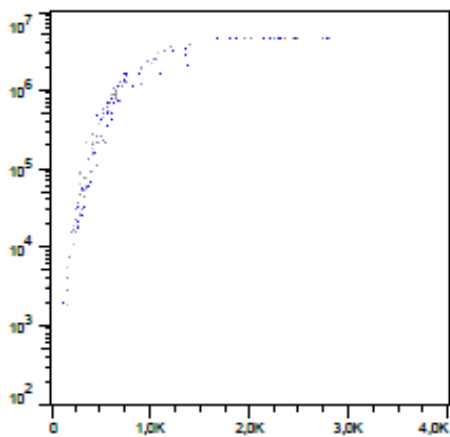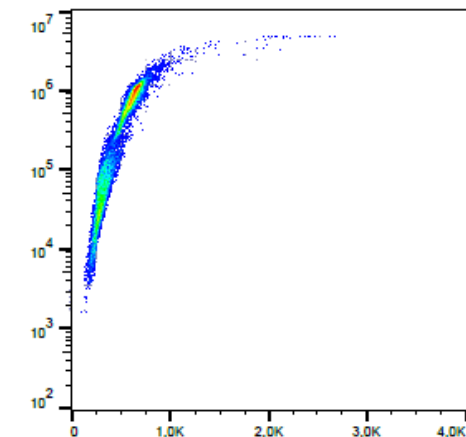

### Standard FFP product

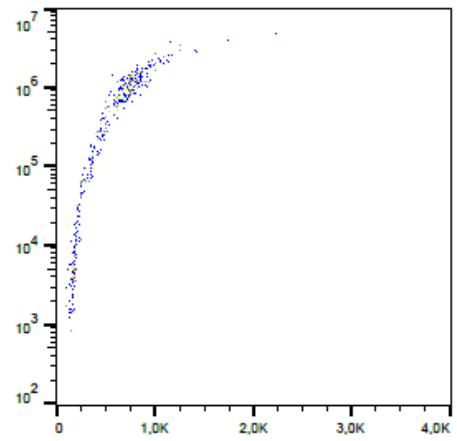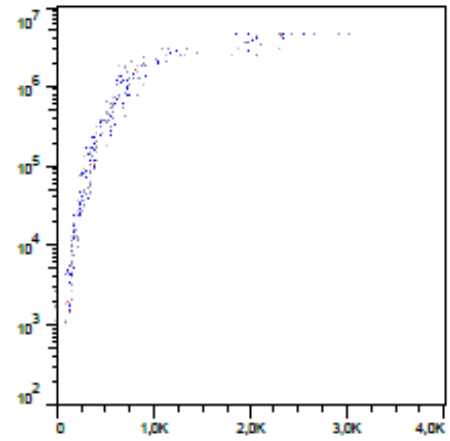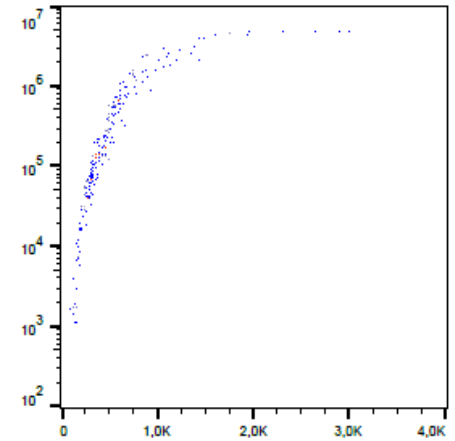

### Optimized FFP product

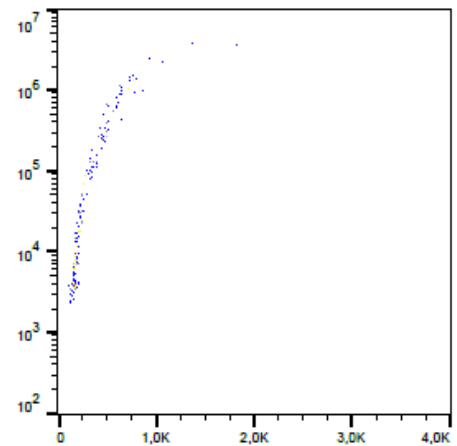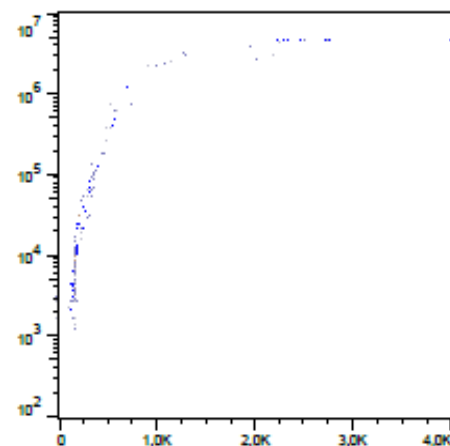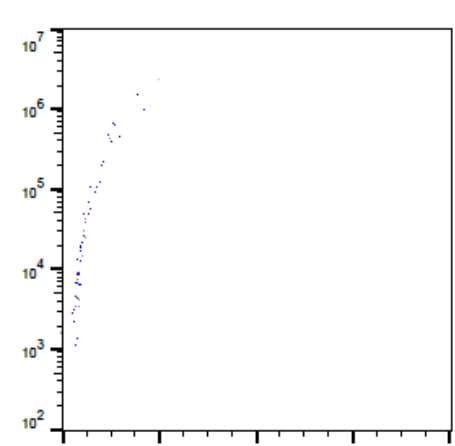

**Standard PLT product**

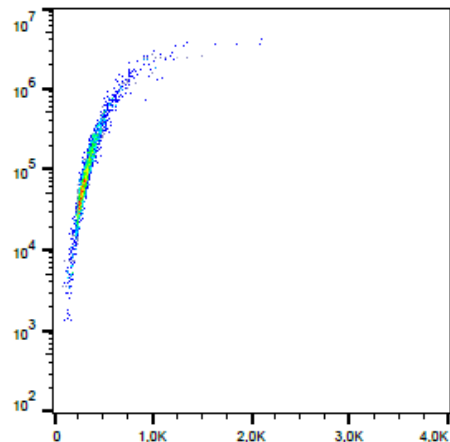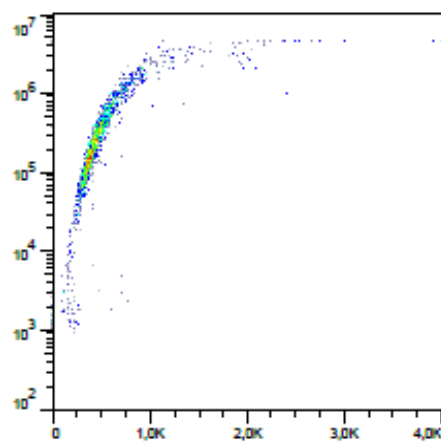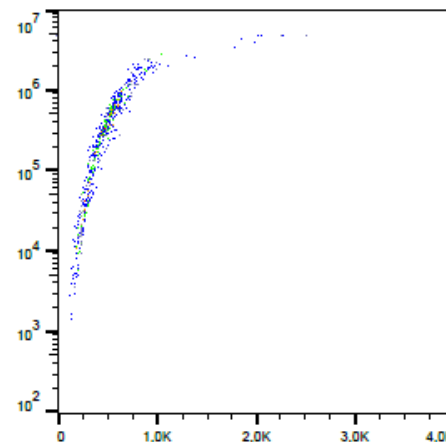

**Optimized PLT product**

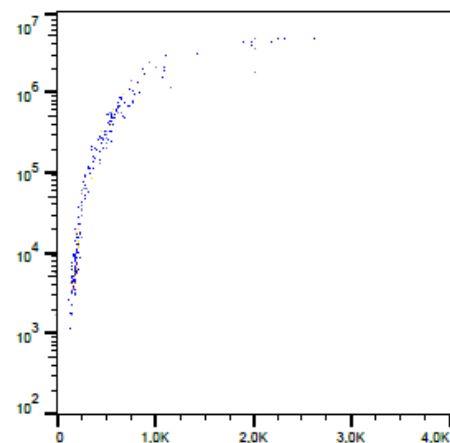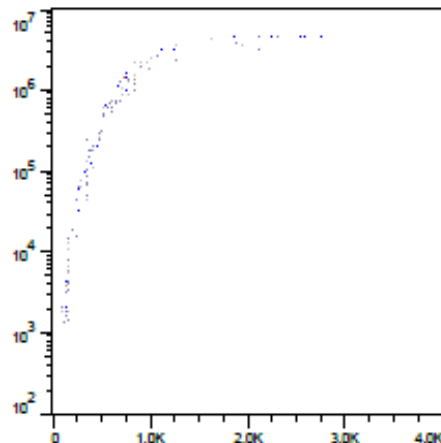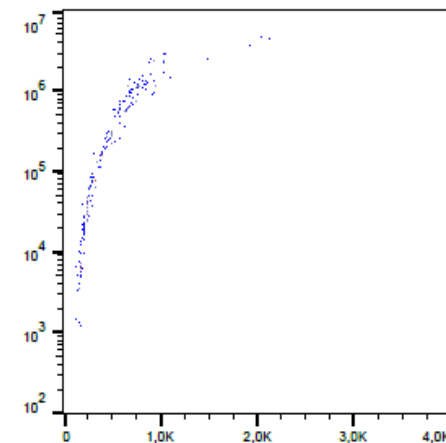

RBC = Red blood cell, PLT = Platelet, FFP = Fresh frozen plasma, EV = extracellular vesicle.

X-axis: Diameter in nm of extracellular vesicles, Y-axis: fluorescent signal (405nm Large Angle Light Scatter, Peak).
